# Supplementary material for: A Comprehensive Single Institutional Review of 2 Years in a Designated Fast-Track Sarcoma Diagnostic Clinic Linked with a Sarcoma Specialist Advisory Group: Meeting the Target but Failing the Task?
Source: Hindawi journal article supplement (doi:10.1155/2016/6032606), 2016-01-01
Supplement: f1 [file 6032606.f1.zip]

Supplementary Table 1 Anatomical distribution of referred lesions.

| Anatomical site | Number | % of all | Anatomical site | Number | % of all |
|-----------------|--------|----------|-----------------|--------|----------|
| Head            | 5      | 1.25     | Forearm         | 20     | 5.03     |
| Neck            | 14     | 3.52     | Hands           | 8      | 2.01     |
| Axilla          | 20     | 5.03     | Groin           | 12     | 3.02     |
| Shoulder        | 32     | 8.06     | Thigh           | 66     | 16.62    |
| Chest wall      | 33     | 8.31     | Knee            | 14     | 3.52     |
| Back            | 43     | 10.83    | Lower leg       | 28     | 7.05     |
| Abdominal wall  | 18     | 4.53     | Foot            | 11     | 2.77     |
| Retroperitoneal | 10     | 2.51     | Intra-abdominal | 2      | 0.50     |
| Buttock         | 13     | 3.27     | Genital         | 1      | 0.25     |
| Upper arm       | 27     | 6.80     | Pelvis          | 17     | 4.28     |
| Elbow           | 6      | 1.51     | Vertebral       | 3      | 0.75     |
