# Supplementary material for: A Comprehensive Single Institutional Review of 2 Years in a Designated Fast-Track Sarcoma Diagnostic Clinic Linked with a Sarcoma Specialist Advisory Group: Meeting the Target but Failing the Task?
Source: Hindawi journal article supplement (doi:10.1155/2016/6032606), 2016-01-01
Supplement: f1 [file 6032606.f1.zip]

Supplementary Table 2 Benign Lesions of Non-Tumourous Nature

| Inflammatory/infective   |   | Traumatic             |    | Other                         |    |
|--------------------------|---|-----------------------|----|-------------------------------|----|
| Abscess                  | 2 | Haematoma             | 10 | Atrophic skeletal muscle      | 1  |
| Arthritis                | 4 | Meniscal tear         | 3  | Bursa                         | 5  |
| Joint effusion           | 1 | Muscle sprain/strain  | 3  | Dialysis induced bone changes | 1  |
| Rotator cuff arthropathy | 1 | Traumatic cyst        | 1  | Endometriosis                 | 4  |
| Tendinosis/tenosynovitis | 6 | Traumatic neuroma     | 1  | Fat necrosis                  | 8  |
| Fasciitis                | 2 | Traumatic periostitis | 1  | Fibrotic reactive tissue      | 1  |
| Bursitis                 | 2 | <b>Cystic lesions</b> |    | Incarcerated inguinal hernia  | 1  |
| Folliculitis             | 1 | Baker's cyst          | 2  | Lumbar hernia                 | 1  |
| Panniculitis             | 1 | Axillary cyst         | 1  | Nodular prurigo               | 1  |
| Inflammatory tissue      | 1 | Bone cyst             | 1  | Osteonecrosis                 | 1  |
| Lupus panniculitis       | 1 | Epidermoid cyst       | 3  | Paget's disease               | 1  |
| Granuloma                | 5 | Sebaceous cyst        | 4  | Diabetic foot                 | 1  |
| Reactive lymphadenopathy | 2 | Meniscal cyst         | 3  |                               |    |
| Cysticercosis            | 1 |                       |    | No abnormality detected       | 14 |
| Thrombophlebitis         | 1 |                       |    | Normal anatomical variation   | 28 |
